# Supplementary material
Source: MDPI journal article supplement (https://www.mdpi.com/2071-1050/12/22/9427)
Supplement: s1 [file s1]

Archive with 7 entries (7 files):
- Figure S1.docx
- Table S1.docx
- Table S2.docx
- Table S3.xlsx
- Table S4.docx
- Table S5.docx
- Table S6.docx
