# Supplementary material
Source: MDPI journal article supplement (https://www.mdpi.com/2071-1050/12/22/9427)
Supplement: s1 [file s1 › Table S1.docx]

| **Site** | **GPS coordinates** | **Potencial source of pesticide residues and the distance from mason bee nests** | **Used active substances (if known; most relevant)** |
| --- | --- | --- | --- |
| Garden 1 | 49°7'17.614"N, 14°10'17.094"E | Fruits, vegetable, ornamental flowers in gardens (location of nests) | unknown |
|  |  | Red currant orchard (15 m, blossom from April 16) | no |
|  |  | Cereals (100 m) | yes |
|  |  | Plum and apple orchards (270 m) | yes (minor growers) |
|  |  | Arable crops (320 m) | yes |
| Garden 2 | 49°8'33.865"N, 14°10'48.870"E | Fruits, vegetable, ornamental flowers in organic garden (location of nests) | no/unknown – adjacent gardens only 20 m far |
|  |  | Arable crops (230 m) | yes |
| Orchard 1 | 49°6'14.714"N, 14°8'51.868"E | Apple orchard (location of nests, blossom on April 22 – May 7) | acetamiprid (April 11), pyrimethanil (April 30) |
|  |  | Apple orchard (50 m, blossom on April 22 – May 7) | yes (minor growers) |
|  |  | Sour cherry orchard (180 m, blossom on April 22 – May 7) | boscalid (May 6) |
|  |  | Oilseed rape (190 m, blossom on April 22 – May 27) | thiacloprid (17 April), azoxystrobin (May 7) |
|  |  | Fruits, vegetable, ornamental flowers in domestic gardens (250 m) | unknown |
| Orchard 2 | 49°6'26.104"N, 14°10'18.368"E | Plum orchard (location of nests, blossom on April 9–25) | boscalid (April 15), acetamiprid (April 26) |
|  |  | Apple orchard (50 m, blossom on April 22 – May 6) | acetamiprid (April 11), pyrimethanil (April 30) |
|  |  | Cereals (70 m) | yes |
|  |  | Apple and plum orchards (150 m) | yes (minor growers) |
|  |  | Oilseed rape (230 m, blossom on April 22 – May 27) | thiacloprid (April 13) |
|  |  | Sour cherry orchard (460 m, blossom on April 22 – May 7) | boscalid (May 6) |
|  |  | Oilseed rape (510 m, blossom on April 22 – May 27) | thiacloprid (April 17), azoxystrobin (May 7) |
|  |  | Fruits, vegetable, ornamental flowers in domestic gardens (630 m) | unknown |

Table S1: The potential sources of pesticide residues in the larval provisions.
