# Supplementary material
Source: MDPI journal article supplement (https://www.mdpi.com/2071-1050/12/22/9427)
Supplement: s1 [file s1 › Table S2.docx]

**Table S2: Schedule of pesticide treatments in fruit orchards and oilseed rape fields.**

| **Pesticide treatments in spring 2019 (up to May 12)** | | | | | | | | |  |  | |
| --- | --- | --- | --- | --- | --- | --- | --- | --- | --- | --- | --- |
| * period of blossoming | | | | |  |  | | | |  | |
|  | |  | | |  |  | | | |  | |
| **Orchard 1 – apple trees – location of nests** | | | | | |  | | | |  | |
| Date | | Formulation | | | Active substance | Function | | | |  | |
| 11.4. | | Mospilan 20SP | | | acetamiprid | IN | | | |  | |
| 17.4. | | Integro | | | methoxyfenozide | IN | | | |  | |
| 25.4. | | Domark 10 EC | | | tetraconazole | FU | | | | * | |
| 26.4. | | Polyram WG | | | metiram | FU | | | | * | |
| 30.4. | | Scala | | | pyrimethanil | FU | | | | * | |
| 2.5. | | Alliete 80 WG | | | fosetyl-AL | FU | | | | * | |
| 3.5. | | Delan Pro | | | dithianon | FU | | | | * | |
| 8.5. | | Scab 480 SC | | | captan | FU | | | |  | |
| 9.5. | | Cyflamid 50 EW | | | cyflufenamid | FU | | | |  | |
|  |
| **Sour cherry tree orchard – 180 m from Orchard 1 nests** | | | | | | | |  | | | | | |  | | |
| Date | | Formulation | | Active substance | | | | Function | | | | | |  | | |
| 24.4. | | Signum | | boscalid, pyraclostrobin | | | | FU | | | | | | * | | |
| 29.4. | | Barbarian super 360 | | glyphosate | | | | HE | | | | | | * | | |
| 6.5. | | Signum | | boscalid, pyraclostrobin | | | | FU | | | | | | * | | |
| 10.5. | | Dithane DG Neotec | | mancozeb | | | | FU | | | | | |  | | |
| **Orchard 2 – plum trees – location of nests** | | | | | | | | |  | | | |  | |
| Date | | | Formulation | | Active substance | | | | Function | | | |  | |
| 15.4. | | | Signum | | boscalid, pyraclostrobin | | | | FU | | | | * | |
| 26.4. | | | Mospilan 20 SP | | acetamiprid | | | | IN | | | |  | |
| 30.4. | | | Barbarian super 360 | | glyphosate | | | | HE | | | |  | |
| 3.5. | | | Integro | | methoxyfenozide | | | | IN | | | |  | |
| **Apple tree orchard – 50 m from Orchard 2 nests** | | | | | | | | | | |  | | | | |
| Date | | Formulation | | Active substance | | | Function | | | |  | | | | |
| 11.4. | | Mospilan 20SP | | acetamiprid | | | IN | | | |  | | | | |
| 17.4. | | Integro | | methoxyfenozide | | | IN | | | |  | | | | |
| 25.4. | | Domark 10 EC | | tetraconazole | | | FU | | | | * | | | | |
| 26.4. | | Polyram WG | | metiram | | | FU | | | | * | | | | |
| 30.4. | | Scala | | pyrimethanil | | | FU | | | | * | | | | |
| 2.5. | | Alliete 80 WG | | fosetyl-AL | | | FU | | | | * | | | | |
| 3.5. | | Delan Pro | | dithianon | | | FU | | | | * | | | | |
| 8.5. | | Scab 480 SC | | captan | | | FU | | | |  | | | | |
| 9.5. | | Cyflamid 50 EW | | cyflufenamid | | | FU | | | |  | | | | |

| **Sour cherry tree orchard - 460 m from Orchard 2 nests** | | | | | | | |  | |  | |
| --- | --- | --- | --- | --- | --- | --- | --- | --- | --- | --- | --- |
| Date | Formulation | | | Active substance | | | Function | | |  | |
| 24.4. | Signum | | | boscalid, pyraclostrobin | | | FU | | | * | |
| 29.4. | Barbarian super 360 | | | glyphosate | | | HE | | | * | |
| 6.5. | Signum | | | boscalid, pyraclostrobin | | | FU | | | * | |
| 10.5. | Dithane DG Neotec | | | mancozeb | | | FU | | |  | |
|  |  | | |  | | |  | | |  | |
| **Oilseed rape field – 190 m from Orchard 1 nests** | | | | | |  | | |  | | | |
| Date | | Formulation | Active substance | | Function | | | |  | |
| 3.4. | | Nurelle D | cypermethrin, chlorpyrifos | | IN | | | |  | |
| 17.4. | | Bariard | thiacloprid | | IN | | | |  | |
| 7.5. | | Symetra | azoxystrobin, isopyrazam | | FU | | | | * | |

| **Oilseed rape field – 230 m from Orchard 2 nests** | | | | | |
| --- | --- | --- | --- | --- | --- |
| Date | | Formulation | Active substance | Function |
| 2.4. | | Korvetto | arylex, clopyralid | HE |
| 13.4. | | Bariard | thiacloprid | IN |
|  | |  |  |  |
| **Oilseed rape field – 510 m from Orchard 2 nests** | | | | | |  |  |
| Date | Formulation | | Active substance | | | Function |  |
| 3.4. | Nurelle D | | cypermethrin, chlorpyrifos | | | IN |  |
| 17.4. | Bariard | | thiacloprid | | | IN |  |
| 7.5. | Symetra | | azoxystrobin, isopyrazam | | | FU | * |
|  |  | |  | | |  |  |
