# Supplementary material
Source: MDPI journal article supplement (https://www.mdpi.com/2071-1050/12/22/9427)
Supplement: s1 [file s1 › Table S3.xlsx]

## Sheet: List1
Active substance surveyed	Analytic method	Unit	LOD1	LOQ2	Detected in samples	Function3
6-Chloronicotinic acid	I-ANNEX-LC	mg/kg	0.0005	0.01
Acetamiprid	I-ANNEX-LC	mg/kg	0.0002	0.01	X	IN
Acetochlor	I-ANNEX-LC	mg/kg	0.0005	0.01
Alachlor	I-ANNEX-LC	mg/kg	0.0007	0.01
Aldicarb	I-ANNEX-LC	mg/kg	0.0005	0.01
Aldicarb sulfone	I-ANNEX-LC	mg/kg	0.0003	0.01
Aldicarb sulfoxide	I-ANNEX-LC	mg/kg	0.003	0.01
Ametryn	I-ANNEX-LC	mg/kg	0.0002	0.01
Atrazine	I-ANNEX-LC	mg/kg	0.0003	0.01
Atrazine-2-hydroxy	I-ANNEX-LC	mg/kg	0.0002	0.01	X	HE
Atrazine-desethyl	I-ANNEX-LC	mg/kg	0.0002	0.01
Atrazine-desisopropyl	I-ANNEX-LC	mg/kg	0.0003	0.01
Azoxystrobin	I-ANNEX-LC	mg/kg	0.0002	0.01	X	FU
Boscalid	I-ANNEX-LC	mg/kg	0.0002	0.01	X	FU
Cadusafos	I-ANNEX-LC	mg/kg	0.0002	0.01
Carbaryl	I-ANNEX-LC	mg/kg	0.0007	0.01
Carbendazim	I-ANNEX-LC	mg/kg	0.0002	0.01	X	FU
Carbofuran	I-ANNEX-LC	mg/kg	0.0002	0.01
Carbofuran-3-hydroxy	I-ANNEX-LC	mg/kg	0.0003	0.01
Chlorfenvinphos	I-ANNEX-LC	mg/kg	0.0005	0.01
Chloridazon	I-ANNEX-LC	mg/kg	0.0009	0.01
Chloridazon-desphenyl	I-ANNEX-LC	mg/kg	0.0005	0.01
Chloridazon-methyl desphenyl	I-ANNEX-LC	mg/kg	0.0006	0.01
Chlorotoluron	I-ANNEX-LC	mg/kg	0.0005	0.01	X	HE
Chlorpyrifos	I-ANNEX-LC	mg/kg	0.0002	0.01	X	IN
Chlorsulfuron	I-ANNEX-LC	mg/kg	0.0002	0.01
Clomazone	I-ANNEX-LC	mg/kg	0.0001	0.01	X	HE
Clothianidin	I-ANNEX-LC	mg/kg	0.0002	0.01
Cyanazine	I-ANNEX-LC	mg/kg	0.0003	0.01
Cyproconazole	I-ANNEX-LC	mg/kg	0.0003	0.01	X	FU
Desmetryn	I-ANNEX-LC	mg/kg	0.0003	0.01
Diazinon	I-ANNEX-LC	mg/kg	0.0002	0.01	X	IN
Dicrotophos	I-ANNEX-LC	mg/kg	0.0002	0.01
Difenacoum	I-ANNEX-LC	mg/kg	0.0004	0.01
Diflufenican	I-ANNEX-LC	mg/kg	0.0002	0.01
Dichlorvos	I-ANNEX-LC	mg/kg	0.0003	0.01
Dimethoate	I-ANNEX-LC	mg/kg	0.0002	0.01
Dimoxystrobin	I-ANNEX-LC	mg/kg	0.0001	0.01	X	FU
Diuron	I-ANNEX-LC	mg/kg	0.0001	0.01	X	HE
Epoxiconazole	I-ANNEX-LC	mg/kg	0.0003	0.01	X	FU
Fenoxycarb	I-ANNEX-LC	mg/kg	0.0004	0.01
Fipronil	I-ANNEX-LC	mg/kg	0.0005	0.01
Fipronil sulfone	I-ANNEX-LC	mg/kg	0.0005	0.01
Fluazifop	I-ANNEX-LC	mg/kg	0.0003	0.01
Fonofos	I-ANNEX-LC	mg/kg	0.0005	0.01
Hexazinone	I-ANNEX-LC	mg/kg	0.0005	0.01
Imidacloprid	I-ANNEX-LC	mg/kg	0.0002	0.01	X	IN
Imidacloprid olefin	I-ANNEX-LC	mg/kg	0.001	0.01
Imidacloprid urea	I-ANNEX-LC	mg/kg	0.0005	0.01
Indoxacarb	I-ANNEX-LC	mg/kg	0.0002	0.01	X	IN
Isoproturon	I-ANNEX-LC	mg/kg	0.0001	0.01	X	HE
Isoproturon-desmethyl	I-ANNEX-LC	mg/kg	0.0001	0.01
Isoproturon-monodesmethyl	I-ANNEX-LC	mg/kg	0.0002	0.01
Kresoxim-methyl	I-ANNEX-LC	mg/kg	0.0005	0.01
Linuron	I-ANNEX-LC	mg/kg	0.0003	0.01
Malaoxon	I-ANNEX-LC	mg/kg	0.0002	0.01
Malathion	I-ANNEX-LC	mg/kg	0.0005	0.01
Metamitron	I-ANNEX-LC	mg/kg	0.0005	0.01	X	HE
Metazachlor	I-ANNEX-LC	mg/kg	0.0002	0.01	X	HE
Metconazole	I-ANNEX-LC	mg/kg	0.0003	0.01	X	FU
Methidathion	I-ANNEX-LC	mg/kg	0.0009	0.01
Methiocarb	I-ANNEX-LC	mg/kg	0.0005	0.01	X	IN
Methiocarb sulfone	I-ANNEX-LC	mg/kg	0.0005	0.01
Methiocarb sulfoxide	I-ANNEX-LC	mg/kg	0.0005	0.01	X	MET
Methomyl	I-ANNEX-LC	mg/kg	0.0004	0.01
Methomyl oxime	I-ANNEX-LC	mg/kg	0.001	0.01
Metolachlor (isomers)	I-ANNEX-LC	mg/kg	0.0003	0.01	X	HE
Metribuzin	I-ANNEX-LC	mg/kg	0.0005	0.01
Oxamyl	I-ANNEX-LC	mg/kg	0.0003	0.01
Pendimethalin	I-ANNEX-LC	mg/kg	0.0005	0.01	X	HE
Pethoxamid	I-ANNEX-LC	mg/kg	0.0001	0.01	X	HE
Phorate	I-ANNEX-LC	mg/kg	0.0005	0.01
Phosalone	I-ANNEX-LC	mg/kg	0.0005	0.01
Phosmet	I-ANNEX-LC	mg/kg	0.0003	0.01
Phosmet oxon	I-ANNEX-LC	mg/kg	0.0002	0.01
Phosphamidon	I-ANNEX-LC	mg/kg	0.0002	0.01
Pirimicarb	I-ANNEX-LC	mg/kg	0.0001	0.01	X	IN
Prochloraz	I-ANNEX-LC	mg/kg	0.0002	0.01	X	FU
Prometon	I-ANNEX-LC	mg/kg	0.0005	0.01
Prometryn	I-ANNEX-LC	mg/kg	0.0005	0.01
Propazine	I-ANNEX-LC	mg/kg	0.0005	0.01
Propiconazole	I-ANNEX-LC	mg/kg	0.0003	0.01	X	FU
Propoxur	I-ANNEX-LC	mg/kg	0.0002	0.01
Pyrimethanil	I-ANNEX-LC	mg/kg	0.0004	0.01	X	FU
Sebuthylazine	I-ANNEX-LC	mg/kg	0.0002	0.01
Simazine	I-ANNEX-LC	mg/kg	0.0002	0.01
Simazine-2-hydroxy	I-ANNEX-LC	mg/kg	0.0001	0.01	X	HE
Simetryn	I-ANNEX-LC	mg/kg	0.0005	0.01
Tebuconazole	I-ANNEX-LC	mg/kg	0.0002	0.01	X	FU
Terbuthylazine	I-ANNEX-LC	mg/kg	0.0002	0.01	X	HE
Terbuthylazine-desethyl	I-ANNEX-LC	mg/kg	0.0002	0.01	X	MET
Terbuthylazine-desethyl-2-hydroxy	I-ANNEX-LC	mg/kg	0.0002	0.01
Terbuthylazine-hydroxy	I-ANNEX-LC	mg/kg	0.0002	0.01
Terbutryn	I-ANNEX-LC	mg/kg	0.0005	0.01	X	HE
Thiacloprid	I-ANNEX-LC	mg/kg	0.0002	0.01	X	IN
Thiamethoxam	I-ANNEX-LC	mg/kg	0.0005	0.01
1 Limits of Detection
2 Limits of Quantifications
3 IN: insecticides, FU: fungicides, HE: herbicides, MET: metabolites.
