# Supplementary material
Source: MDPI journal article supplement (https://www.mdpi.com/2071-1050/12/22/9427)
Supplement: s1 [file s1 › Table S4.docx]

Table S4. List of pesticide residues and their prevalence in samples.

| Residues with higher prevalence  (86–100 %) | | | | Residues with lower prevalence (≤71 %) | | | |
| --- | --- | --- | --- | --- | --- | --- | --- |
| Active substance | Function1 |  | % | Active substance | Function |  | % |
| Pyrimethanil | FU |  | 100 | Terbuthylazine-desethyl | MET |  | 71 |
| Azoxystrobin | FU |  | 100 | Dimoxystrobin | FU |  | 64 |
| Tebuconazole | FU-EBI |  | 100 | Chlorotoluron | HE |  | 57 |
| Terbuthylazine | HE |  | 100 | Pethoxamid | HE |  | 50 |
| Thiacloprid | IN-NEO |  | 100 | Prochloraz | FU-EBI |  | 36 |
| Boscalid | FU |  | 93 | Cyproconazole | FU |  | 29 |
| Propiconazole | FU-EBI |  | 93 | Pendimethalin | HE |  | 21 |
| Epoxiconazole | FU-EBI |  | 93 | Methiocarb | IN-CAR |  | 21 |
| Acetamiprid | IN-NEO |  | 93 | Isoproturon | HE |  | 14 |
| Carbendazim | FU |  | 86 | Indoxacarb | IN |  | 14 |
| Chlorpyrifos | IN-ORG |  | 86 | Methiocarb sulfoxide | MET |  | 14 |
| Metamitron | HE |  | 86 | Pirimicarb | IN-CAR |  | 7 |
|  |  |  |  | Metconazole | FU-EBI |  | 7 |
|  |  |  |  | Metolachlor (isomers) | HE |  | 7 |
|  |  |  |  | Clomazone | HE |  | 7 |
|  |  |  |  | Metazachlor | HE |  | 7 |
|  |  |  |  | Diuron | HE |  | 7 |
|  |  |  |  | Simazine-2-hydroxy | HE |  | 7 |
|  |  |  |  |  |  |  |  |

1 FU: fungicide

FU-EBI: ergosterol biosynthesis inhibitor (EBI) fungicide

IN: insecticide

IN-NEO: neonicotinoid insecticide

IN-ORG: organophosphate insecticide

IN-CAR: carbamate insecticide

HE: herbicide

MET: metabolite.
