# Supplementary material
Source: MDPI journal article supplement (https://www.mdpi.com/2071-1050/12/22/9427)
Supplement: s1 [file s1 › Table S5.docx]

Table S5: Concentrations of pesticide residues in the larval provisions of the red mason bee (including all values which higher than LOD ).

| **Garden 1A** | **ppb** |
| --- | --- |
| Pyrimethanil | 76.2073 |
| Tebuconazole | 9.60318 |
| Pendimethalin | 4.62515 |
| Terbuthylazine | 4.61519 |
| Metamitron | 3.49995 |
| Boscalid | 2.04175 |
| Terbuthylazine-desethyl | 1.96623 |
| Epoxiconazole | 1.69743 |
| Propiconazole | 0.73728 |
| Azoxystrobin | 0.6938 |
| Thiacloprid | 0.33584 |
| Acetamiprid | 0.31006 |

| **Garden 1B** | **ppb** |
| --- | --- |
| Pyrimethanil | 417.0016 |
| Tebuconazole | 13.70599 |
| Acetamiprid | 12.19715 |
| Metamitron | 7.872503 |
| Carbendazim | 4.723424 |
| Pendimethalin | 4.352759 |
| Terbuthylazine | 4.249625 |
| Boscalid | 2.847608 |
| Isoproturon | 1.923249 |
| Prochloraz | 1.467979 |
| Propiconazole | 0.802028 |
| Chlorotoluron | 0.626284 |
| Epoxiconazole | 0.61281 |
| Azoxystrobin | 0.446926 |
| Thiacloprid | 0.438841 |
| Chlorpyrifos | 0.302865 |

| **Garden 1C** | **ppb** |
| --- | --- |
| Pyrimethanil | 51.6327 |
| Tebuconazole | 12.6966 |
| Dimoxystrobin | 4.47172 |
| Terbuthylazine | 3.95543 |
| Metamitron | 3.17596 |
| Pendimethalin | 2.78496 |
| Boscalid | 0.7962 |
| Propiconazole | 0.6977 |
| Azoxystrobin | 0.46243 |
| Epoxiconazole | 0.46104 |
| Thiacloprid | 0.29767 |

| **Garden 2A** | **ppb** |
| --- | --- |
| Terbuthylazine | 14.4959 |
| Tebuconazole | 8.82852 |
| Dimoxystrobin | 5.50151 |
| Prochloraz | 4.78997 |
| Propiconazole | 4.58221 |
| Boscalid | 2.33445 |
| Azoxystrobin | 1.71347 |
| Chlorotoluron | 1.39784 |
| Chlorpyrifos | 1.28196 |
| Pyrimethanil | 1.16083 |
| Carbendazim | 1.01709 |
| Epoxiconazole | 0.57971 |
| Thiacloprid | 0.46483 |
| Acetamiprid | 0.42376 |

| **Garden 2B** | **ppb** |
| --- | --- |
| Tebuconazole | 6.733097 |
| Terbuthylazine | 5.183568 |
| Metamitron | 4.435199 |
| Propiconazole | 2.757786 |
| Chlorpyrifos | 1.523826 |
| Azoxystrobin | 0.997445 |
| Carbendazim | 0.859155 |
| Pyrimethanil | 0.801552 |
| Acetamiprid | 0.780419 |
| Epoxiconazole | 0.721284 |
| Chlorotoluron | 0.602706 |
| Diuron | 0.292742 |
| Pethoxamid | 0.287143 |
| Thiacloprid | 0.266448 |

| **Orchard 1A** | **ppb** |
| --- | --- |
| Pyrimethanil | 1677.879 |
| Boscalid | 1603.0528 |
| Tebuconazole | 86.856429 |
| Azoxystrobin | 19.701379 |
| Prochloraz | 18.489554 |
| Thiacloprid | 9.4163174 |
| Metamitron | 7.2267624 |
| Acetamiprid | 6.8369414 |
| Terbuthylazine | 5.3640174 |
| Chlorotoluron | 5.0043071 |
| Chlorpyrifos | 4.3592582 |
| Indoxacarb | 2.224978 |
| Methiocarb | 1.7311384 |
| Epoxiconazole | 1.3526182 |
| Carbendazim | 1.0684554 |
| Terbuthylazine-desethyl | 1.0223935 |
| Propiconazole | 0.7863317 |
| Pethoxamid | 0.4157289 |
| Cyproconazole | 0.3907556 |
| Dimoxystrobin | 0.3162594 |
| Pirimicarb | 0.109357 |

| **Orchard 1B** | **ppb** |
| --- | --- |
| Pyrimethanil | 312.0165 |
| Boscalid | 106.6945 |
| Tebuconazole | 14.60802 |
| Acetamiprid | 8.994614 |
| Terbuthylazine | 5.942506 |
| Metamitron | 4.305673 |
| Azoxystrobin | 3.864429 |
| Dimoxystrobin | 2.61561 |
| Thiacloprid | 1.617491 |
| Terbuthylazine-desethyl | 1.331871 |
| Chlorpyrifos | 1.167815 |
| Metolachlor (isomers) | 1.057421 |
| Carbendazim | 1.052403 |
| Epoxiconazole | 0.555261 |
| Pethoxamid | 0.523761 |
| Propiconazole | 0.456551 |
| Cyproconazole | 0.393326 |

| **Orchard 1C** | **ppb** |
| --- | --- |
| Boscalid | 730.7861 |
| Pyrimethanil | 437.2601 |
| Tebuconazole | 15.65288 |
| Azoxystrobin | 14.79058 |
| Acetamiprid | 5.256343 |
| Terbuthylazine | 4.096062 |
| Metamitron | 2.645716 |
| Thiacloprid | 2.296218 |
| Chlorpyrifos | 1.401139 |
| Terbuthylazine-desethyl | 1.039102 |
| Epoxiconazole | 0.595801 |
| Carbendazim | 0.590556 |
| Cyproconazole | 0.308978 |

| **Orchard 1D** | **ppb** |
| --- | --- |
| Boscalid | 1359.4552 |
| Azoxystrobin | 275.03423 |
| Pyrimethanil | 254.46406 |
| Tebuconazole | 11.436163 |
| Prochloraz | 8.2771096 |
| Acetamiprid | 5.1911064 |
| Terbuthylazine | 4.121242 |
| Metamitron | 2.9898881 |
| Dimoxystrobin | 2.4760013 |
| Thiacloprid | 2.3303996 |
| Chlorotoluron | 1.9146533 |
| Chlorpyrifos | 1.741513 |
| Terbuthylazine-desethyl | 1.0925145 |
| Carbendazim | 0.5711214 |
| Epoxiconazole | 0.4864294 |
| Propiconazole | 0.4228794 |
| Clomazone | 0.3901459 |
| Pethoxamid | 0.3752393 |
| Cyproconazole | 0.3249631 |

| **Orchard 2A** | **ppb** |
| --- | --- |
| Pyrimethanil | 631.1516 |
| Azoxystrobin | 290.437 |
| Boscalid | 31.30693 |
| Tebuconazole | 27.67636 |
| Thiacloprid | 10.90026 |
| Acetamiprid | 10.7383 |
| Metamitron | 6.448424 |
| Dimoxystrobin | 3.756432 |
| Carbendazim | 2.671742 |
| Chlorpyrifos | 2.558377 |
| Terbuthylazine | 2.457534 |
| Propiconazole | 1.949072 |
| Prochloraz | 1.400196 |
| Terbuthylazine-desethyl | 1.004007 |
| Chlorotoluron | 0,983484 |
| Epoxiconazole | 0.744166 |
| Pethoxamid | 0.552802 |
| Metazachlor | 0.320899 |
| Simazine-2-hydroxy | 0.158582 |

| **Orchard 2B** | **ppb** |
| --- | --- |
| Pyrimethanil | 846.7323 |
| Boscalid | 205.6031 |
| Tebuconazole | 52.87282 |
| Acetamiprid | 9.316593 |
| Thiacloprid | 9.147831 |
| Chlorotoluron | 4.265632 |
| Metamitron | 3.86446 |
| Methiocarb | 3.832166 |
| Terbuthylazine | 2.835774 |
| Azoxystrobin | 2.354795 |
| Dimoxystrobin | 1.980952 |
| Chlorpyrifos | 1.734951 |
| Carbendazim | 1.700573 |
| Methiocarb sulfoxide | 0.997968 |
| Terbuthylazine-desethyl | 0.884226 |
| Propiconazole | 0.783407 |
| Pethoxamid | 0.567076 |

| **Orchard 2C** | **ppb** |
| --- | --- |
| Pyrimethanil | 2424.5911 |
| Boscalid | 37.204965 |
| Methiocarb | 18.545404 |
| Tebuconazole | 11.135121 |
| Acetamiprid | 8.2157146 |
| Carbendazim | 5.2589284 |
| Metamitron | 4.6635734 |
| Terbuthylazine | 4.2037924 |
| Thiacloprid | 3.894491 |
| Dimoxystrobin | 2.3393448 |
| Methiocarb sulfoxide | 1.7441197 |
| Chlorotoluron | 1.6218871 |
| Azoxystrobin | 1.3861726 |
| Terbuthylazine-desethyl | 1.2784793 |
| Chlorpyrifos | 0.9693609 |
| Epoxiconazole | 0.4544483 |
| Propiconazole | 0.4125162 |

| **Orchard 2D** | **ppb** |
| --- | --- |
| Pyrimethanil | 2446.3212 |
| Boscalid | 375.74809 |
| Tebuconazole | 215.92848 |
| Acetamiprid | 18.779105 |
| Thiacloprid | 5.7012588 |
| Metamitron | 5.4003751 |
| Terbuthylazine | 2.4375708 |
| Carbendazim | 2.2406699 |
| Dimoxystrobin | 1.3882184 |
| Terbuthylazine-desethyl | 0.9060912 |
| Azoxystrobin | 0.588381 |
| Propiconazole | 0.5286458 |
| Chlorpyrifos | 0.4105977 |
| Metconazole | 0.3895532 |
| Epoxiconazole | 0.3438482 |
| Indoxacarb | 0.2565605 |

| **Orchard 2E** | **ppb** |
| --- | --- |
| Boscalid | 1383.9437 |
| Tebuconazole | 407.87252 |
| Pyrimethanil | 10.181581 |
| Acetamiprid | 5.0548101 |
| Terbuthylazine | 0.9616029 |
| Chlorpyrifos | 0.5047562 |
| Epoxiconazole | 0.4888277 |
| Thiacloprid | 0.461858 |
| Carbendazim | 0.4142861 |
| Propiconazole | 0.3596875 |
| Terbuthylazine-desethyl | 0.3488279 |
| Azoxystrobin | 0.206042 |
| Isoproturon | 0.1313722 |
| Pethoxamid | 0.1282676 |
