# Supplementary material
Source: MDPI journal article supplement (https://www.mdpi.com/2071-1050/12/22/9427)
Supplement: s1 [file s1 › Table S6.docx]

Table S6. Numbers of pesticide residues and sums of their concentrations in samples.

| **Site** | **Nest** | **Number of pesticide residues** | | |  |  | **Sum of concentration of residues** |
| --- | --- | --- | --- | --- | --- | --- | --- |
|  |  | **IN1** | **HE** | **FU** | **MET** | **Total** | **ppb** |
| Garden 1 | A | 2 | 4 | 5 | 1 | 12 | 106.3 |
|  | B | 3 | 7 | 6 | 0 | 16 | 473.6 |
|  | C | 1 | 4 | 6 | 0 | 11 | 81.4 |
| Garden 2 | A | 3 | 2 | 9 | 0 | 14 | 48.6 |
|  | B | 3 | 5 | 6 | 0 | 14 | 26.2 |
| Orchard 1 | A | 6 | 6 | 8 | 1 | 21 | 3453.6 |
|  | B | 3 | 5 | 8 | 1 | 17 | 467.2 |
|  | C | 3 | 3 | 6 | 1 | 13 | 1216.7 |
|  | D | 3 | 6 | 9 | 1 | 19 | 1933.1 |
| Orchard 2 | A | 3 | 5 | 9 | 2 | 19 | 1027.2 |
|  | B | 4 | 4 | 7 | 2 | 17 | 1149.5 |
|  | C | 4 | 3 | 8 | 2 | 17 | 2527.9 |
|  | D | 4 | 2 | 9 | 1 | 16 | 3077.4 |
|  | E | 3 | 4 | 6 | 1 | 14 | 1811.1 |
| 1 IN: insecticides, HE: herbicides, FU: fungicides, MET: metabolites. | | | | | | |  |
