# Supplementary material
Source: MDPI journal article supplement (https://www.mdpi.com/2071-1050/12/22/9427)

Figure S1: Orthophotos of the experimental sites


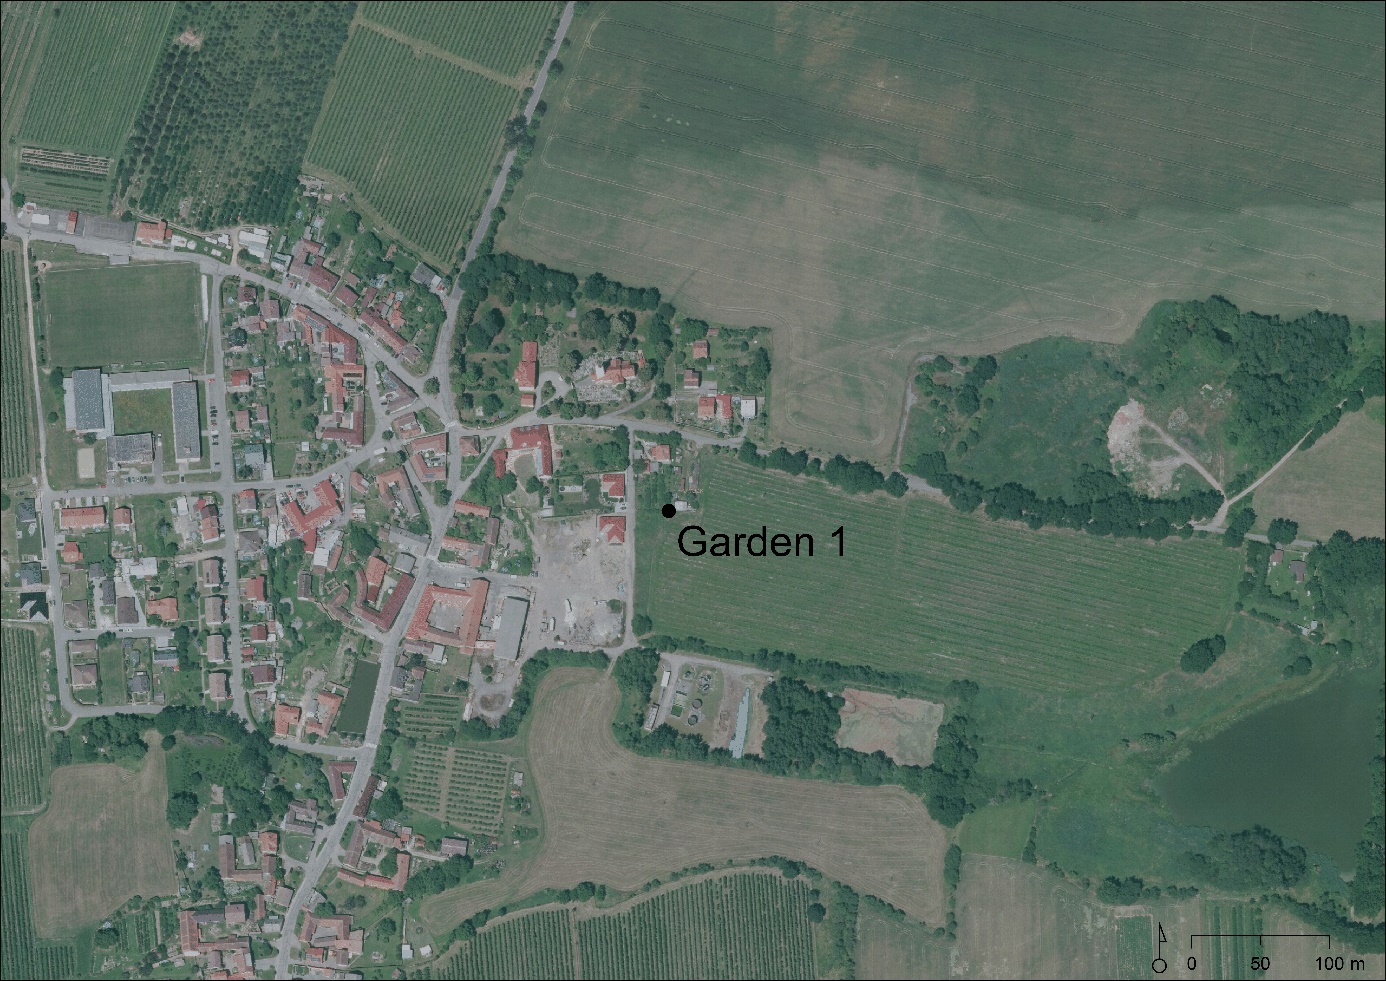


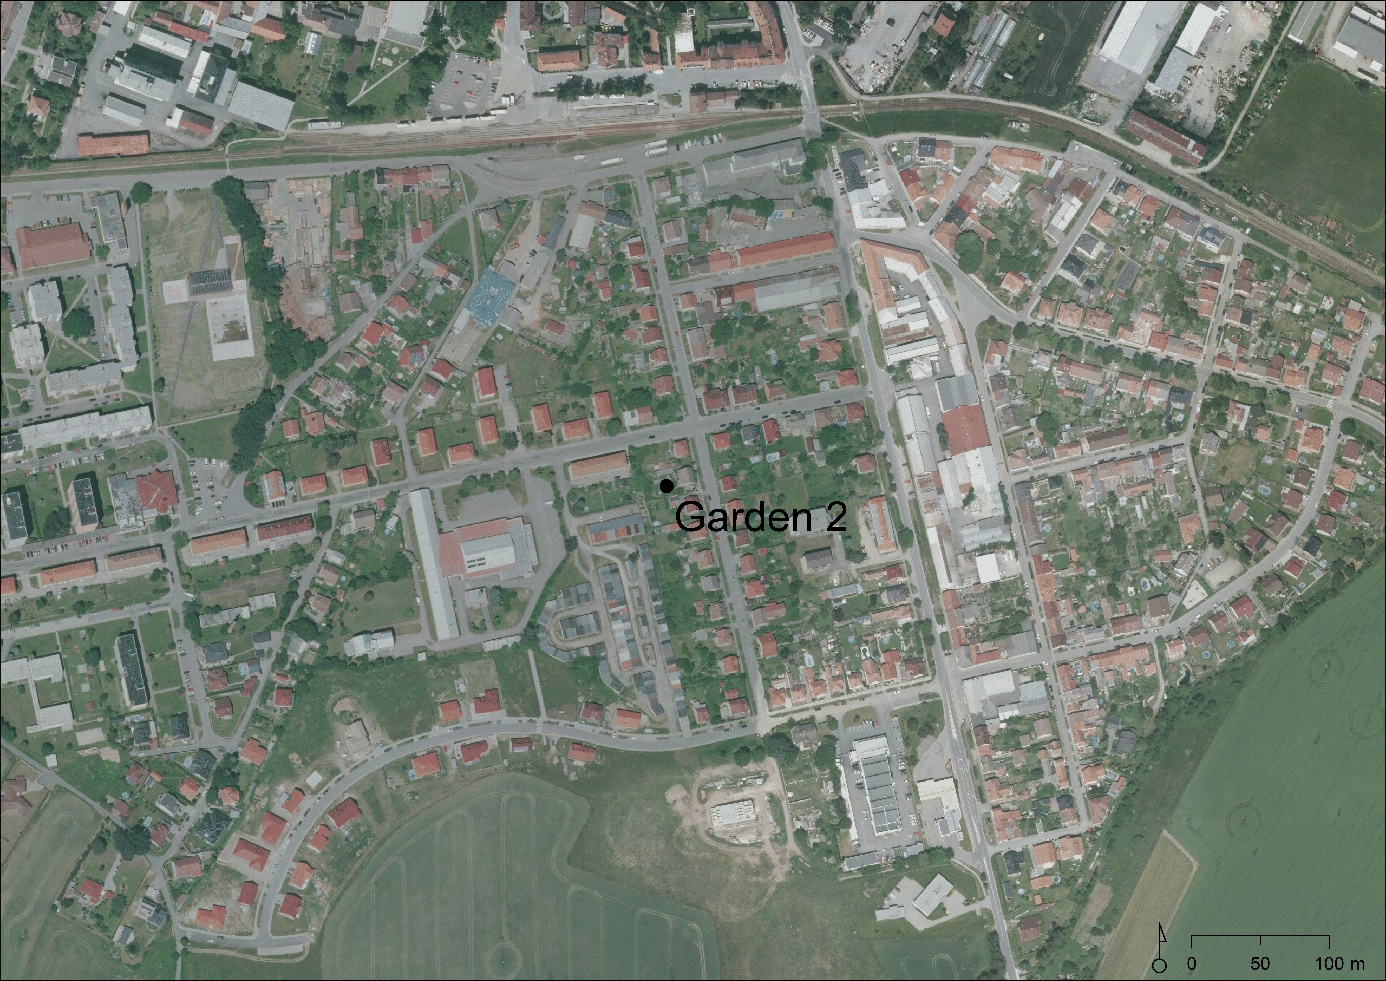


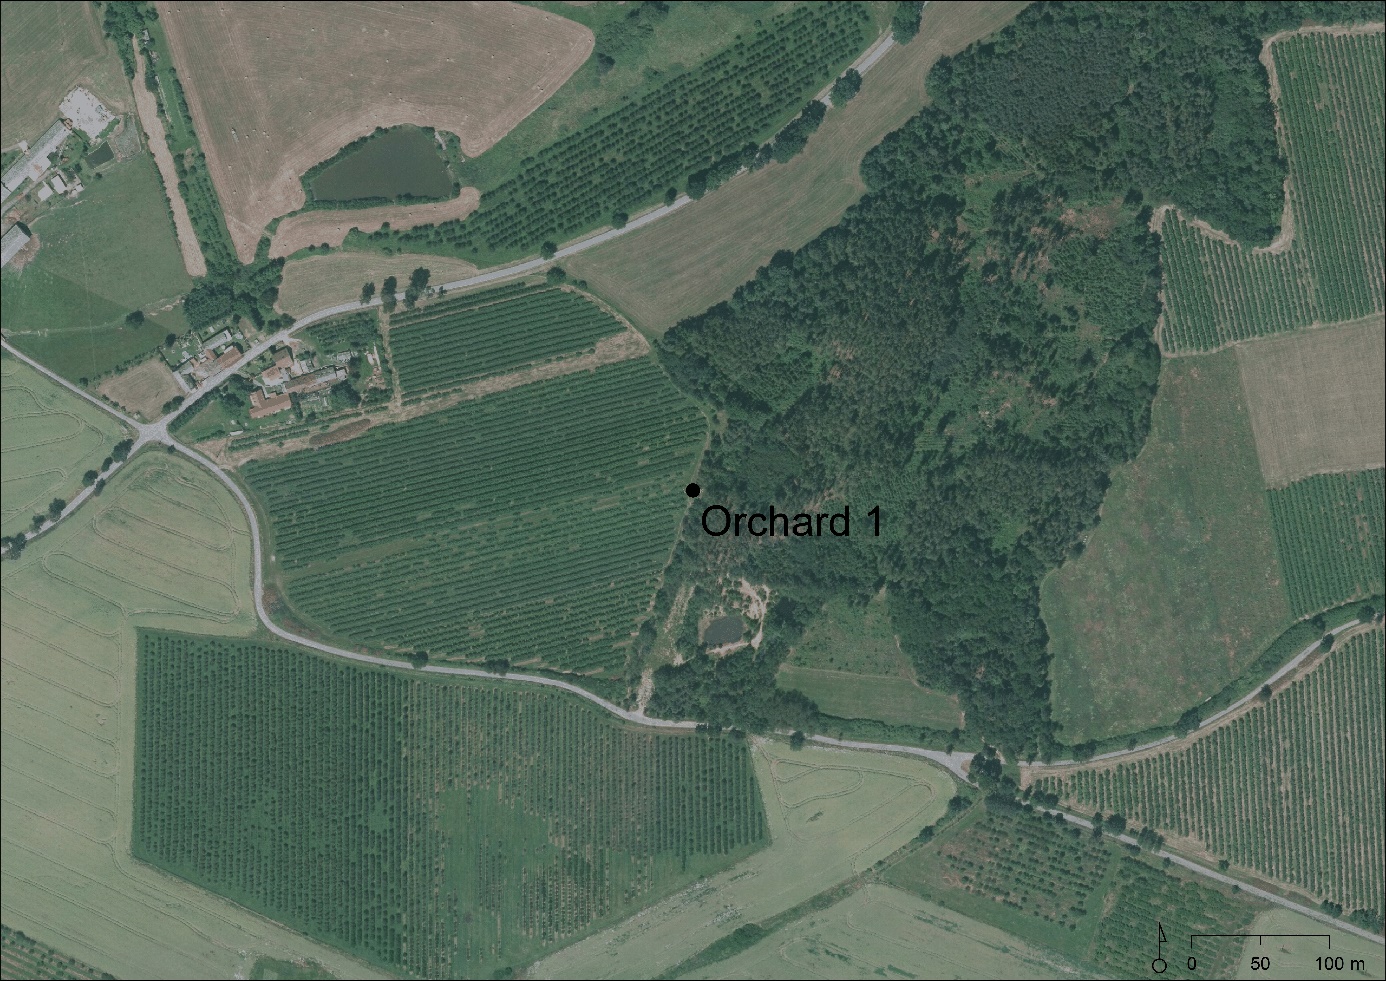


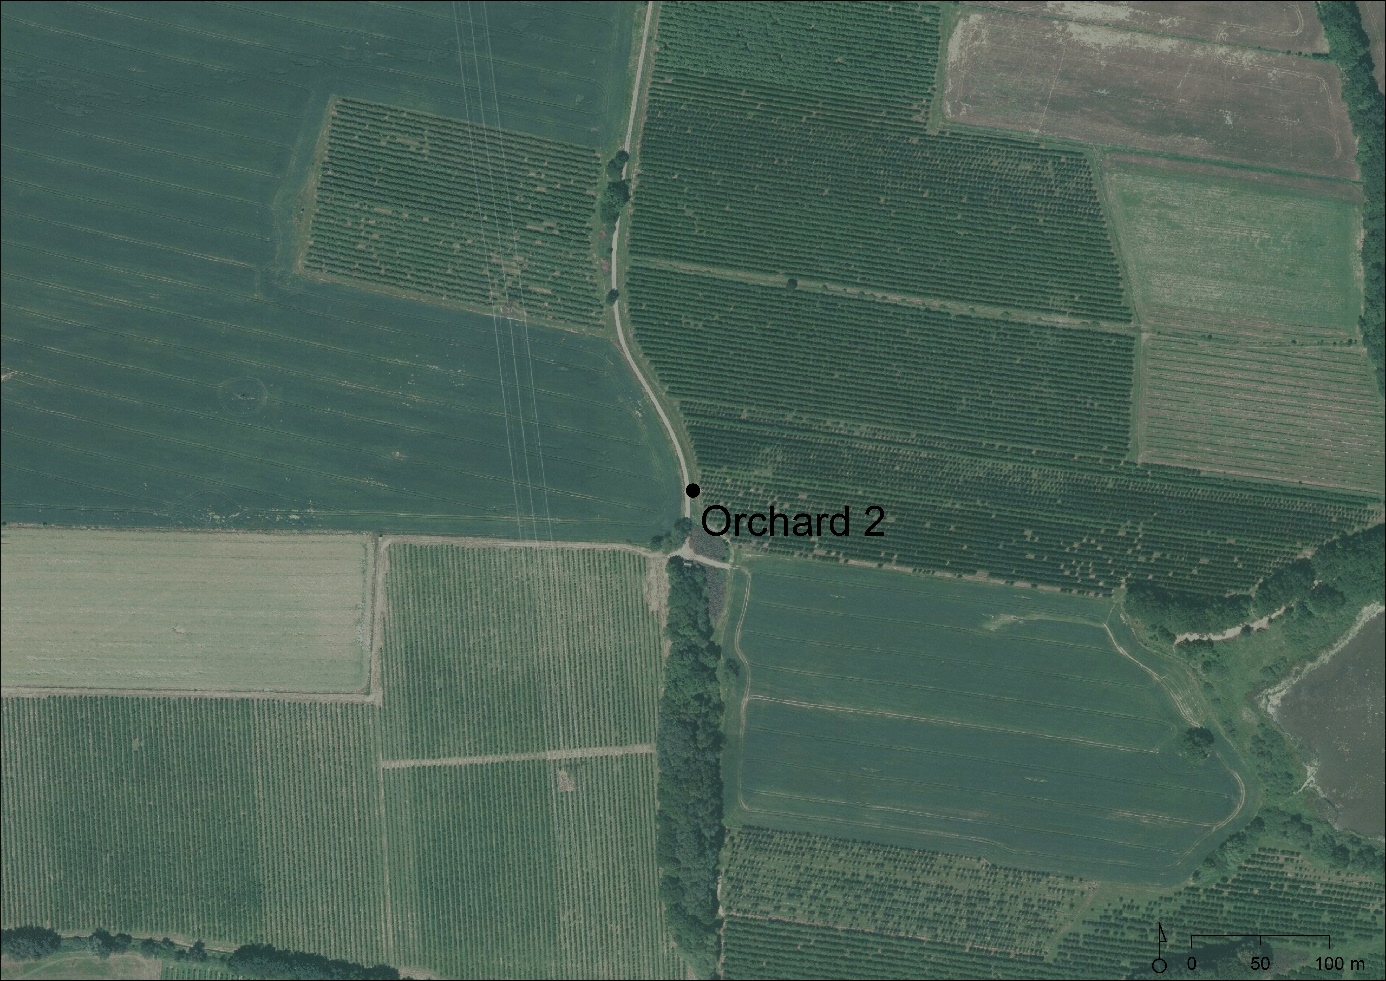

Supplement: s1 [file s1 › Figure S1.docx]
